# Supplementary material for: Phaeochromocytomas/paragangliomas and adverse clinical outcomes in patients with Neurofibromatosis type 1
Source: PubMed Central journal article supplement — Endocr Connect. 2018 Aug 15;7(10):R254–9. doi: 10.1530/EC-18-0208 (PMC6198184; doi:10.1530/ec-18-0208), 2018-08-15
Supplement: ec-7-R254-t001.pdf [file ec-7-R254-t001.pdf]

Supplementary Data : cases of NF-1 and PHAEO/PG in the literature

| Author                         | Year | Sex | Age | Any of classical symptoms ? | Reported symptoms                                       | HTN | Presentation | U/B | Size (cm)  | Complications/other diagnosis if present |
|--------------------------------|------|-----|-----|-----------------------------|---------------------------------------------------------|-----|--------------|-----|------------|------------------------------------------|
| Takamyia et al <sup>1</sup>    | 2017 | M   | 33  | N                           |                                                         | N   | Incidental   | U   | 5          | Sudden death and myocarditis             |
| Tate et al <sup>2</sup>        | 2017 | M   | 24  | Y                           | Abdominal pain,<br>Headache,<br>Palpitations,<br>tremor | N   | Incidental   | U   | 6.4        | -                                        |
| Seo et al <sup>3</sup>         | 2017 | M   | 35  | N                           | Bleeding                                                | N   | Incidental   | U   | 3.3        | -                                        |
| Lee Y et al <sup>4</sup>       | 2017 | F   | 49  | Y                           | Palpitations<br>Sweating                                | N   | Incidental   | U   | 20         | Acute stroke                             |
| Remon-Ruiz et al <sup>5</sup>  | 2017 | F   | 31  | Y                           | Headache<br>Tremors<br>Pallor<br>hypertension           | Y   | symptomatic  | U   | 2.3        | Hypertensive crisis                      |
| Pan et al <sup>6</sup>         | 2016 | M   | 56  | N                           | Abdominal pain<br>Cough<br>Fever<br>SOB                 | Y   | Incidental   | U   | 9          |                                          |
| Treyger G et al <sup>7</sup>   | 2015 | F   | 60  | y                           | Palpitations                                            | Y   | Symptoms     | B   | 3.1<br>3.0 | Hypertensive crisis                      |
| Varghese P et al <sup>8</sup>  | 2015 | M   | 60  | Y                           | Headache ,neck pain,<br>unsteadiness                    | N   | Incidental   | U   | -          |                                          |
| Jayalakshmy et al <sup>9</sup> | 2015 | F   | 26  | y                           | Hypertension Headache<br>Flank pain                     | Y   | -            | U   | 6.5        |                                          |
| Petrovoska et al <sup>10</sup> | 2015 | M   | 36  | Y                           |                                                         | Y   | Hypertension | U   | 6          | -                                        |

|                                |      |   |    |   |                                                                          |   |              |   |            |                                                                                                               |
|--------------------------------|------|---|----|---|--------------------------------------------------------------------------|---|--------------|---|------------|---------------------------------------------------------------------------------------------------------------|
| Teasdale et al <sup>11</sup>   | 2015 | M | 53 | Y | Abdominal pain<br>Palpitations<br>Sweating's<br>Dizziness<br>Weight loss | N | Incidental   | U | 8          |                                                                                                               |
| Teasdale et al <sup>12</sup>   | 2015 | F | 29 | Y | Headache<br>Palpitations<br>Chest pain<br>Sweating<br>SOB                | Y | Symptomatic  | U | 7.7        | Takotsubo cardiomyopathy                                                                                      |
| Yamamoto et al <sup>13</sup>   | 2014 | M | 26 | y | Palpitations                                                             | N | Symptoms     | U | 4.4        | -                                                                                                             |
| Ahmed et al <sup>14</sup>      | 2014 | F | 49 | N | Hypertension Chest pain<br>SOB                                           | Y | Hypertension | U | 4.7        | Acute cardiomyopathy and multi-organ failure                                                                  |
| Giovannoni et al <sup>15</sup> | 2014 | M | 16 | Y | Headache<br>Visual impairment<br>Nausea vomiting                         | Y |              | U | 6          | Malignant pheo confirmed with lymph nodes metastases                                                          |
| Gorgel et al <sup>16</sup>     | 2014 | M | 47 | N | N                                                                        | N | incidental   | B | 7<br>2     |                                                                                                               |
| Gorgel et al <sup>17</sup>     | 2014 | M | 50 | N | Pain-not specified                                                       | Y | Incidental   | B | 4.5<br>3.5 |                                                                                                               |
| Gorgel et al <sup>18</sup>     | 2014 | M | 43 | N | N                                                                        | N | Incidental   | U | 5.5        | GIST , papillary thyroid cancer                                                                               |
| Behera et al <sup>19</sup>     | 2013 | M | 33 | Y | Headache<br>Constipation<br>Back pain<br>Urgency<br>Difficulty walking   | N | Incidental   | U | 2.8        | Primary hyperparathyroidism                                                                                   |
| Doleman et al <sup>20</sup>    | 2013 | M | 60 | N | Limb claudication                                                        | N | Incidental   | B | 3.6<br>3.2 | Rupture of the left external iliac artery following angioplasty and development of an arterial pseudoaneurysm |
| Ozcinar et al <sup>21</sup>    | 2013 | M | 48 | N | Black stool                                                              | Y | Incidental   | U | 2.2        |                                                                                                               |
| Harrison et                    | 2013 | F | 58 | N | Constipation                                                             | Y | Incidental   | U | 6          | Metastatic PHAEO to liver and                                                                                 |

|                               |      |   |    |   |                                                    |   |             |                     |            |  |                                                                  |
|-------------------------------|------|---|----|---|----------------------------------------------------|---|-------------|---------------------|------------|--|------------------------------------------------------------------|
| al <sup>22</sup>              |      |   |    |   | Abdominal pain<br>Leg pain<br>Weight loss          |   |             |                     |            |  | bone                                                             |
| Datta et al <sup>23</sup>     | 2013 | F | 35 | N | Weakness                                           | Y | incidental  | U                   | 6.7        |  | Acute stroke                                                     |
| Cecchi et al <sup>24</sup>    | 2013 | F | 37 | N | N                                                  | N | incidental  | U                   | 8          |  | Pulmonary oedema and Death post delivery -autopsy confirmed Pheo |
| Vlenterie et al <sup>25</sup> | 2013 | F | 59 | N | Fatigue                                            | N |             | <u>U</u>            | 7          |  | GIST                                                             |
| Vlenterie et al <sup>26</sup> | 2013 | M | 55 | Y | Tachycardia                                        | Y |             | B                   | 5.4<br>5.8 |  | GIT stroma I tumor                                               |
| Hataya et al <sup>27</sup>    | 2012 | F | 65 | Y | Palpitations<br>Chest pains<br>Nausea<br>LOC       | Y | symptomatic | B                   | 7, 2       |  | GIST ,MPNS tumor                                                 |
| Mujamder et al <sup>28</sup>  | 2012 | F | 34 | N | Abdominal pain<br>Nausea<br>Vomiting               | N | Incidental  | Extra-<br>a-<br>adr | 6.8        |  | Composite pheochromocytoma and ganglioneuroma                    |
| Banfi et al <sup>29</sup>     | 2012 | F | 20 | N | Chest pain<br>SOB<br>Cough<br>fever                | Y |             | U                   | -          |  | Pheo crisis and acute heart failure                              |
| Kumar et al <sup>30</sup>     | 2011 | F | 67 | N | Abdominal pain                                     | Y | Incidental  | U                   | 4.6        |  |                                                                  |
| Tan et al <sup>31</sup>       | 2011 | F | 70 | Y | Palpitations<br>SOB<br>Backpain                    | Y | Incidental  | U                   | 5.5        |  | Malignant pheo with bony mets , primary hyperparathyroidism      |
| Rapp et al <sup>32</sup>      | 2011 | M | 35 | Y | Backpain<br>Sweating<br>Light headedness<br>Nausea | Y | Incidental  | U                   | 7.7        |  | Hemithorax and mediastinal haemorrhage                           |
| Mahajan et al <sup>33</sup>   | 2010 | F | 54 | N | Chest pain<br>Nausea                               | Y |             | U                   | -          |  | -Composite pheo and ganglioneuroma                               |

|                                  |      |   |    |   |                                                              |   |              |   |     |                                                              |
|----------------------------------|------|---|----|---|--------------------------------------------------------------|---|--------------|---|-----|--------------------------------------------------------------|
|                                  |      |   |    |   | vomiting                                                     |   |              |   |     |                                                              |
| Mahajan et al <sup>34</sup>      | 2010 | F | 49 | Y | Headache<br>Sweating<br>Palpitations<br>Anxiety<br>Diarrhoea | N | Incidental   | U | 6   | -Composite pheo and ganglioneuroma                           |
| Gkaliagkousi et al <sup>35</sup> | 2009 | F | 70 | Y | Headache<br>Sweating<br>Abdominal pain                       | Y | Incidental   | U | 7   | MEN2 A                                                       |
| Babinska et al <sup>36</sup>     | 2008 | F | 30 | Y | Headache<br>Palpitation<br>Tremors<br>pallor                 | Y | Hypertension | U | 6.2 | Myocardial infarction                                        |
| Zografos et al <sup>37</sup>     | 2008 | - | 37 | y | Arrhythmias<br>Sweating<br>hypertension                      | y | symptomatic  | U | 8   | -                                                            |
| De Toma et al <sup>38</sup>      | 2007 | M | 42 | Y | Palpitation                                                  | Y | Hypertension | U | 1.5 | -                                                            |
| Kremer et al <sup>39</sup>       | 2007 | F | 63 | Y | Headache<br>Palpitations<br>Nausea                           | Y | symptomatic  | U | 5   | -GIST                                                        |
| Erem et al <sup>40</sup>         | 2007 | M | 30 | Y | Headache ,Palpitations<br>,sweating                          | Y | Incidental   | U | 5   | -                                                            |
| Conlon et al <sup>41</sup>       | 2007 | M | 40 | N | Abdominal pain<br>collapse                                   | N | incidental   | U | 2   | Massive hemithorax due to rupture of internal mammary artery |
| Boulikina et al <sup>42</sup>    | 2007 | F | 43 | y | Headaches<br>Palpitations<br>Sweating<br>Chest pain<br>SOB   | y |              | U |     | Acute myocardial infarction and pulmonary oedema .           |

|                                |      |   |    |   |                                                    |   |              |            |            |                                                                             |
|--------------------------------|------|---|----|---|----------------------------------------------------|---|--------------|------------|------------|-----------------------------------------------------------------------------|
| Mezitis et al <sup>43</sup>    | 2007 | F | 41 | N | N                                                  | N | Incidental   | U          | 4          | Ganglioneuroma                                                              |
| Termato et al <sup>44</sup>    | 2007 | F | 60 | y | Headache<br>Vomiting                               | y | Incidental   | U          | 3          | GIST                                                                        |
| Termato et al <sup>45</sup>    | 2007 | F | 67 | N | N                                                  | Y | Hypertension | B          | 6.0        | GIST                                                                        |
| Ezri et al <sup>46</sup>       | 2006 | F | 32 | N | N                                                  | N | Incidental   | U          | 4          | Heart failure                                                               |
| Altinova et al <sup>47</sup>   | 2006 | M | 35 | y | Headache<br>Palpitations                           | y | Symptomatic  | B          | 8.5<br>2.2 | - Primary hyperparathyroidism                                               |
| Perren et al <sup>48</sup>     | 2006 | M | 60 | N |                                                    | y | Hypertension | B          | 2.5<br>1.0 | Hypertensive crisis during surgery                                          |
| Liswski et al <sup>49</sup>    | 2006 | F | 82 | N | Constipation                                       | N | incidental   | U          | 2.5        |                                                                             |
| Lew et al <sup>50</sup>        | 2005 | F | 43 | Y | Headaches<br>Dizziness                             | N | incidental   | U          | 1.0        | -                                                                           |
| Gursoy et al <sup>51</sup>     | 2006 | F | 26 | Y | SOB<br>Headache<br>Palpitation<br>sweating         | Y | incidental   | U          | 6          |                                                                             |
| Onozawa et al <sup>52</sup>    | 2005 | F | 47 | N | Muscle weakness<br>Watery diarrhoea<br>Weight loss | y | incidental   | U          | 10         | VIP compsite Pheo                                                           |
| Al- Wahabi et al <sup>53</sup> | 2005 | M | 65 | y | Headaches                                          | Y | Hypertension | B          | -          | .Primary hyperparathyroidism                                                |
| Lockhart et al <sup>54</sup>   | 2000 | F | 33 | y | Headaches<br>Abdominal pain<br>Rectal bleeding     | Y | incidental   | U          | 4.4        | ganglioneuroma                                                              |
| Ku et al <sup>55</sup>         | 2010 | M | 59 | N | Weakness<br>Abdominal pain                         | Y | Incidental   | B          | -          | -                                                                           |
| Carsote et al <sup>56</sup>    | 2012 | F | 61 | N |                                                    | Y | Hypertension | U          | 1.1        | GIST                                                                        |
| Katechis et al <sup>57</sup>   | 2005 | M | 36 | N | N and Vomitting<br>Palpitation                     | y | Hypertension | Extra-adre | 5          | acute myocardial infarction and retroperitnoenal malignant pheochromocytoma |

|                               |      |   |    |   |                                                  |   |             |     |     |                                                                      |
|-------------------------------|------|---|----|---|--------------------------------------------------|---|-------------|-----|-----|----------------------------------------------------------------------|
|                               |      |   |    |   | Abdomen and chest pain                           |   |             | nal |     |                                                                      |
| Satake et al <sup>58</sup>    | 2001 | F | 59 | N | Weight loss                                      | y | Incidental  | U   | 10  | a metastatic malignant composite pheochromocytoma , subsequent death |
| Takahashi et al <sup>59</sup> | 2014 | F | 29 | N | N                                                | Y | Incidental  | U   | 5   | Post delivery acute pulmonary oedema ,                               |
| Sandhu et al <sup>60</sup>    | 2010 | M | 39 | Y | Anxiety<br>Sweating<br>Palpitation<br>headaches6 | Y | Incidental  | U   | 6.3 | GIST                                                                 |
| Wilsher et al <sup>61</sup>   | 2011 | F | 52 | N | N                                                | Y | incidental  | U   | 3.4 | malignant                                                            |
| Outokeush et al <sup>62</sup> | 2014 | F | 55 | N | Chest pain                                       | Y | -           |     | -   | malignant                                                            |
| Teslianou et al <sup>63</sup> | 2017 | M | 54 | Y | Palpitations<br>Presyncope<br>vertigo            | Y | symptoms    | U   | 9   | Myocarditis                                                          |
| Tran et al <sup>64</sup>      | 2017 | M | 57 | N | bleeding                                         | N | Incidental  | U   | 3.6 | Composite PHEO and neuroblastoma                                     |
| Di Miguel et al <sup>65</sup> | 2017 | M | 25 | Y | Sweating,<br>headache, palpitation               | Y | Symptoms    | B   | 4 4 | Persistent HTN and renal failure                                     |
| Takmatsu et al <sup>66</sup>  | 2017 | F | 60 | N | Chest pain<br>fever                              | y | incidental  | U   |     | Type 2 MI and hypertensive crisis                                    |
| Almeida et al <sup>67</sup>   | 2013 | M | 36 | Y | Sweating<br>Wt loss<br>fatigue                   | Y | Symptoms    | U   | 7.9 | Hypertensive emergencies, and malignant PHEO                         |
| Xin-Yi Ng et al <sup>68</sup> | 2012 | F | 47 | N | N                                                | N | Incidental  | U   | 3.4 |                                                                      |
| Bumming et al <sup>69</sup>   | 2005 | M | 46 | N | N                                                | Y | Hypertensio | U   | 6   | Myocardial infarction                                                |

|                             |      |   |    |   |                                                   | n |            |   |     | GIST                                      |
|-----------------------------|------|---|----|---|---------------------------------------------------|---|------------|---|-----|-------------------------------------------|
| Magill et al <sup>70</sup>  | 2006 | M | 44 | Y | palpitation, headache, sweating, light-headedness | Y | incidental | U | 3.4 | Cardiomyopathy                            |
| Azough et al <sup>71</sup>  | 2009 | F | 35 | N | Collapse<br>Abdominal pain                        | N | Incidental | U | 1.1 | Shock due to adrenal rupture and bleeding |
| Petidis et al <sup>72</sup> | 2008 | F | 45 | Y | Headache, tachycardia, abdominal pain , fever     | N | Incidental | B | 6   | Thromosis :portal vein and splenic artery |
| Wong CL et al <sup>73</sup> | 2018 | F | 65 | Y | Palpitation                                       | N | Symptoms   | U | 1.9 | Primary hyperparathyroidism               |

1. Takamiya M, Niitsu H, Saigusa K. An Autopsy Case of Sudden Death in Neurofibromatosis Type 1 With Pheochromocytoma and Myocarditis. *Am J Forensic Med Pathol.* 2018 Mar;39(1):78-81
2. Tate JM, Gyorffy JB & Colburn JA . The importance of pheochromocytoma case detection in patients with neurofibromatosis type 1: A case report and review of literature. *SAGE Open Med Case Rep.* 2017; 5: 2050313X17741016
3. Yoorim Seo, Yeonjeong Jeong, Dong Yoon Kim, Kyueun Choi, Eun Sook Kim, Sung Dae Moon& Je Ho Han. A novel neurofibromatosis type 1 (*NF1*) mutation in a patient with *NF1* and pheochromocytoma . *Korean J Intern Med* 2018;33(1):214-217
4. Yingshan Lee, Leon Yuan rui Tan, Yong Howe Ho & Melvin Khee shing Leow .Giant phaeochromocytoma presenting with an acute stroke: reappraising phaeochromocytoma surveillance for the neurofibromatosis type 1 phakomatosis. *BMJ Case Rep* Nov 2017 bcr-2017-222553.
5. Pablo Remón-Ruiz, Alberto Aliaga-Verdugo & Raquel Guerrero-Vázquez (2016): Pheochromocytoma in neurofibromatosis type 1 during pregnancy, *Gynecological Endocrinology*, DOI: 10.1080/09513590.2016.1254181

6. Pan D, Liang P, & Xiao H. Neurofibromatosis type 1 associated with pheochromocytoma and gastrointestinal stromal tumors: A case report and literature review. *Oncology Letters* 2016 12 637-643. <https://doi.org/10.3892/ol.2016.4670>
7. Treyger G, Silver SA & Sakharova AA. Pheochromocytoma Diagnosis After an Abnormal Stress Test: Case Report and Review of the Literature. *J Am Osteopath Assoc.* 2015 Jul;115(7):e3-7. doi: 10.7556/jaoa.2015.092
8. Prithvi Varghese & Muhammed Jasim Abdul Jalal. A rare case of neurofibromatosis – type 1. *Asian J Neurosurg.* 2015 Oct-Dec; 10(4): 344–347
9. P S Jayalakshmy, A. Anish Mohan, Rajesk K. Kumar & P. Junaina Beevi. A rare combination of pheochromocytoma and gastrointestinal stromal tumour in a patient with neurofibromatosis 1 syndrome—a case report. *Surgical Case Reports* (2015) 1:102 DOI 10.1186/s40792-015-0107-4
10. Julijana Petrovska, Biljana Gerasimovska Kitanovska, Stevka Bogdanovska & Svetlana Pavleska Kuzmanoska. Pheochromocytoma and Neurofibromatosis Type 1 in a Patient with Hypertension. *Open Access Maced J Med Sci.* 2015 Dec 15; 3(4): 713–716
11. Stephanie Teasdale & Elham Reda. Neurofibromatosis-related phaeochromocytoma: two cases with large tumours and elevated plasma methoxytyramine. *EDM Case Reports* 2015 9 EDM150059
12. Stephanie Teasdale & Elham Reda. Neurofibromatosis-related phaeochromocytoma: two cases with large tumours and elevated plasma methoxytyramine. *EDM Case Reports* 2015 9 EDM150059
13. Takanobu Yamamoto ,Kohei Hashimoto & Naoki Itoh. Case of pheochromocytoma associated with neurofibromatosis type 1 developing postoperative hypertension. *International Journal of Urology* (2014) 21 1187–1188

14. Ahmed R, Darrat Y, Hamoudeh E, Elhamdani MO & Yaqub A. Acute cardiomyopathy and multiorgan failure in a patient with pheochromocytoma and neurofibromatosis type 1. *J Pak Med Assoc.* 2014 Feb;64(2):214-6
15. Giovannoni I, Callea F, Boldrini R, Inserra A, Cozza R & Francalanci P. Malignant pheochromocytoma in a 16-year-old patient with neurofibromatosis type 1. *Pediatr Dev Pathol.* 2014 Mar-Apr;17(2):126-9
16. Gorgel A, Cetinkaya DD, Salgur F, Demirpence M, Yilmaz H, Karaman EH, Tutuncuoglu P, Oruk G, Bahceci M, Sari AA, Altinboga AA & Paker I. Coexistence of gastrointestinal stromal tumors (GISTs) and pheochromocytoma in three cases of neurofibromatosis type 1 (NF1) with a review of the literature. *Intern Med.* 2014;53(16):1783-9. Epub 2014 Aug 15.
17. Gorgel A, Cetinkaya DD, Salgur F, Demirpence M, Yilmaz H, Karaman EH, Tutuncuoglu P, Oruk G, Bahceci M, Sari AA, Altinboga AA & Paker I. Coexistence of gastrointestinal stromal tumors (GISTs) and pheochromocytoma in three cases of neurofibromatosis type 1 (NF1) with a review of the literature. *Intern Med.* 2014;53(16):1783-9. Epub 2014 Aug 15.
18. Gorgel A, Cetinkaya DD, Salgur F, Demirpence M, Yilmaz H, Karaman EH, Tutuncuoglu P, Oruk G, Bahceci M, Sari AA, Altinboga AA & Paker I. Coexistence of gastrointestinal stromal tumors (GISTs) and pheochromocytoma in three cases of neurofibromatosis type 1 (NF1) with a review of the literature. *Intern Med.* 2014;53(16):1783-9. Epub 2014 Aug 15.
19. Behera KK, Nanaiah A, Gupta A & Rajaratnam S. Neurofibromatosis type 1, pheochromocytoma with primary hyperparathyroidism: A rare association. *Indian J Endocrinol Metab.* 2013 Mar;17(2):349-51
20. Doleman B1, Kaushal S, Patel A, Kirk J & Quarmby J. Rupture of the Left External Iliac Artery and Right Groin Pseudoaneurysm Formation following Angioplasty in a Patient with Neurofibromatosis Type 1 and Undiagnosed Bilateral Pheochromocytoma. *Case Rep Radiol.* 2013;2013:526421

21. Ozcinar B, Aksakal N, Agcaoglu O, Tukenmez M, Ozemir IA, Barbaros U, Colak N & Erbil Y. Multiple gastrointestinal stromal tumors and pheochromocytoma in a patient with von Recklinghausen's disease. *Int J Surg Case Rep.* 2013;4(2):216-8
22. Harrison CE1, Barron BJ. MIBG superscan of metastatic paraganglioma occurring with neurofibromatosis type 1. *Clin Nucl Med.* 2013 Jun;38(6):459-62
23. Datta S & Bhattacharjee S. Type I neurofibromatosis with pheochromocytoma. *Int J Med Sci Public Health* 2013; 2:770-771.
24. Cecchi R ,Fрати P , Capri O & Cipolloni L . A Rare Case of Sudden Death Due to Hypotension during Cesarean Section in a Woman Suffering from Pheochromocytoma and Neurofibromatosis *J Forensic Sci*, November 2013, Vol. 58, No. 6 doi: 10.1111/1556-4029.12279
25. Vlenterie M, Flucke U, Hofbauer LC, Timmers HJ, Gastmeier J, Aust DE, van der Graaf WT, Wesseling P, Eisenhofer G & Lenders JW. Pheochromocytoma and gastrointestinal stromal tumors in patients with neurofibromatosis type I. *Am J Med.* 2013 Feb;126(2):174-80
26. Vlenterie M, Flucke U, Hofbauer LC, Timmers HJ, Gastmeier J, Aust DE, van der Graaf WT, Wesseling P, Eisenhofer G & Lenders JW. Pheochromocytoma and gastrointestinal stromal tumors in patients with neurofibromatosis type I. *Am J Med.* 2013 Feb;126(2):174-80
27. Hataya Y, Komatsu Y, Osaki K, Fukuda Y, Sato T & Morimoto T. A case of neurofibromatosis type 1 coinciding with bilateral pheochromocytomas, multiple gastrointestinal stromal tumors, and malignant peripheral nerve sheath tumor. *Intern Med.* 2012;51(12):1531-6. Epub 2012 Jun 15.
28. Majumder S, Grabska J, Trikudanathan G, Kowalczyk P, Stoica-Mustafa E & Dasanu CA. Functional 'composite' pheochromocytoma-ganglioneuroma presenting as a pancreatic mass. *Pancreatology.* 2012 May-Jun;12(3):211-4
29. Banfi C, Juthier F, Ennezat PV, de Saint Denis T, Carnaille B, Leteurtre E, Prat A & Vincentelli A. Central extracorporeal life support in pheochromocytoma crisis. *Ann Thorac Surg.* 2012 Apr;93(4):1303-5

30. Hari Kumar KV, Shaikh A, Sandhu AS & Prusty P. Neurofibromatosis 1 with pheochromocytoma. *Indian J Endocrinol Metab.* 2011 Oct;15 Suppl 4:S406-8
31. Tan M, Camargo CA, Mojtahed A & Mihm F. Malignant pheochromocytoma presenting as incapacitating bony pain. *Pain Pract.* 2012 Apr;12(4):286-9
32. Rapp M, Martino J & Allen GB. A 35-year-old patient with midscapular pain and hypertension. *Chest.* 2011 Jul;140(1):258-261.
33. Mahajan H, Lee D, Sharma R, Chin P, Watt WH, McBride G & Bilous M. Composite phaeochromocytoma-ganglioneuroma, an uncommon entity: report of two cases. *Pathology.* 2010 Apr;42(3):295-8
34. Mahajan H, Lee D, Sharma R, Chin P, Watt WH, McBride G & Bilous M. Composite phaeochromocytoma-ganglioneuroma, an uncommon entity: report of two cases. *Pathology.* 2010 Apr;42(3):295-8
35. Gkaliagkousi E, Erlic Z, Petidis K, Semertzidis P, Doulas M, Zamboulis C, Neumann HP & Douma S. Neurofibromatosis type 1: should we screen for other genetic syndromes? A case report of co-existence with multiple endocrine neoplasia 2A. *Eur J Clin Invest.* 2009 Sep;39(9):828-32.
36. Babińska A, Gnacińska A, Swiatkowska-Stodulska R & Sworzczak K. Myocardial infarction in a 30-year-old patient with pheochromocytoma and type 1 neurofibromatosis. *Pol Arch Med Wewn.* 2008 Sep;118(9):517-23.
37. Zografos GN, Vasiliadis GK, Zagouri F, Aggeli C, Korkolis D, Vogiaki S, Pagoni MK, Kaltsas G & Piaditis G. Pheochromocytoma associated with neurofibromatosis type 1: concepts and current trends. *World J Surg Oncol.* 2010 Mar 10;8:14
38. De Toma G, Letizia C, Cavallaro G, Polistena A, Cotesta D, Petramala L, Porciello R, Giustini S & Calvieri S. Adrenal pheochromocytoma and jejunal neurofibroma in type 1 neurofibromatosis: report of a case. *G Chir.* 2007 May;28(5):199-202.

39. Kramer K, Hasel C, Aschoff AJ, Henne-Bruns D & Wuerl P. Multiple gastrointestinal stromal tumors and bilateral pheochromocytoma in neurofibromatosis. *World J Gastroenterol.* 2007 Jun 28;13(24):3384-7.
40. Erem C, Onder Ersoz H, Ukinc U, Hachihasanoglu A, Alhan E, Cobanoglu U, Kocak M & Erdol H. Neurofibromatosis type 1 associated with pheochromocytoma: a case report and review of the literature. *J. Endocrinol. Invest.* 2007 30:59-64
41. Conlon NP, Redmond KC, Celi LA. Spontaneous hemothorax in a patient with neurofibromatosis type 1 and undiagnosed pheochromocytoma. *Ann Thorac Surg.* 2007 Sep;84(3):1021-3
42. Boulkina LS, Newton CA, Drake AJ 3rd, Tanenberg RJ. Acute myocardial infarction attributable to adrenergic crises in a patient with pheochromocytoma and neurofibromatosis 1. *Endocr Pract.* 2007 May-Jun;13(3):269-73.
43. Mezitis SG, Geller M, Bocchieri E, Del Pizzo J, Merlin S. Association of pheochromocytoma and ganglioneuroma: unusual finding in neurofibromatosis type 1. *Endocr Pract.* 2007 Oct;13(6):647-51
44. Teramoto S, Ota T, Maniwa A, Matsui T, Itaya N, Aoyagi K, Kusanagi H & Narita M. Two von Recklinghausen's disease cases with pheochromocytomas and gastrointestinal stromal tumors (GIST) in combination. *Int J Urol.* 2007 Jan;14(1):73-4.
45. Teramoto S, Ota T, Maniwa A, Matsui T, Itaya N, Aoyagi K, Kusanagi H & Narita M. Two von Recklinghausen's disease cases with pheochromocytomas and gastrointestinal stromal tumors (GIST) in combination. *Int J Urol.* 2007 Jan;14(1):73-4.
46. Ezri T, Golan A, Sasson L & Rozenman Y. Pheochromocytoma induced fulminant cardiogenic shock following laparoscopic salpingectomy, successfully managed with extracorporeal membrane oxygenation. *Jurnalul Roman de Anestezie Terapie Intensiva;* Oct 2009; vol. 16 (no. 2); p. 154-158

47. Altinova AE , Torune F, Cimen AR, Karakoc A, Atasever T, Yetkin I, Ayvaz G ,Cakir N & Arslan M. The Association of neurofibromatosis, Bilateral Pheochromocytoma and Primary Hyperparathyroidism. *Exp Clin Endocrinol Diabetes* 2007; 115: 468– 4 70
48. Aurel Perren & Paul Komminoth. Familial Pheochromocytomas and Paragangliomas: Stories From the Sign-Out Room. *Endocrine Pathology* 2006;174: 337–344
49. Lisewski D, Ryan S, Lim EM, Frost F, Nguyen H. Concomitant composite adrenal pheochromocytoma, multiple gastric stromal tumours and pseudohermaphroditism in a patient with von Recklinghausen's disease. *Int Semin Surg Oncol.* 2006 Apr 26;3:11
50. **Lew** JI, Jacome FJ & Solorzano CC. Neurofibromatosis associated pheochromocytoma. *J Am Coll Surg.* 2006 Mar;202(3):550-1
51. Gursoy A & Erdogan MF. Severe pulmonary involvement and pheochromocytoma in atypical patient with neurofibromatosis type 1. *Endocr Pract.* 2006 Jul-Aug;12(4):469-71.
52. Onozawa M, Fukuhara T, Minoguchi M, Takahata M, Yamamoto Y, Miyake T, Kanagawa K, Kanda M & Maekawa I. Hypokalemic rhabdomyolysis due to WDHA syndrome caused by VIP-producing composite pheochromocytoma: a case in neurofibromatosis type 1. *Jpn J Clin Oncol.* 2005 Sep;35(9):559-63.
53. Al-Wahab B. Parathyroid adenoma and bilateral pheochromocytoma in a patient with neurofibromatosis. *Ann Saudi Med* 2005 25(3) 255-257
54. Lockhart ME , Smith JK, Canon CL, Morgan DE & Heslin MJ. Appendiceal Ganglioneuromas and Pheochromocytoma in Neurofibromatosis Type 1. *AJR Am J Roentgenol.* 2000 Jul;175(1):132-4.
55. Ku YK, Sangla K, Tan YM & Williams DJ. A case of using cortical sparing adrenalectomy to manage bilateral phaeochromocytoma in neurofibromatosis type 1. *Internal Medicine Journal* 40 (2010) 239–246

56. Carșote M, Păun S, Neamțu MC, Avramescu ET, Iosif C, Terzea D, Constantinoiu S, Dănciulescu Miulescu R, Neamțu OM & Poiană C. The immunohistochemistry aspects in two cases of neurofibromatosis-associated abdominal tumors. *Rom J Morphol Embryol.* 2012;53(2):401-5.
57. Katechis D, Makaryus AN, Spatz A, Freeman J & Diamond JA. Acute myocardial infarction in a patient with pheochromocytoma and neurofibromatosis. *J Invasive Cardiol.* 2005 Jun;17(6):331-3.
58. Satake H, Inoue K, Kamada M, Watanabe H, Furihata M & Shuin T. Malignant composite pheochromocytoma of the adrenal gland in a patient with von Recklinghausen's disease. *J Urol.* 2001 Apr;165(4):1199-200.
59. Takahashi N, Nishijima K, Orisaka M, Tsuyoshi H, Kurokawa T, Kato K, Shirafuji A, Arakawa K, Hisazaki K, Tada H & Yoshida Y. Amniotic fluid embolism triggered by hypertensive crisis due to undiagnosed pheochromocytoma in a pregnant subject with neurofibromatosis-1. *AACE Clinical Case Rep* 2015 **1(3)** e178-e181
60. Sandhu SK, McKenzie P, Yu B & Chua E. A case of using cortical sparing adrenalectomy to manage bilateral pheochromocytoma in neurofibromatosis type 1. *Internal Medicine Journal* 40 (2010) 239–246
61. Wilsher MJ. Metachronous malignant composite pheochromocytoma and pancreatic mucinous cystadenoma in a patient with neurofibromatosis type 1. *Pathology.* 2011 Feb;43(2):170-4.
62. Otoukesh S, Cooper CJ, Lou W, Mojtahedzadeh M, Nasrazadani A, Wampler M & Nahleh Z. Combination chemotherapy regimen in a patient with metastatic malignant pheochromocytoma and neurofibromatosis type 1. *Am J Case Rep.* 2014 Mar 25;15:123-7
63. Tesloianu DN, Ursaru AM, Mitu O, Bostaca T, Danila N, Ciobanu D & Petris AO. Giant pheochromocytoma in type 1 neurofibromatosis patient. *Anatol J Cardiol.* 2017 Apr;17(4):E2-E3.

64. Tran L, Fitzpatrick C, Cohn SL & Pytel P. Composite tumor with pheochromocytoma and immature neuroblastoma: report of two cases with cytogenetic analysis and discussion of current terminology. *Virchows Arch.* 2017 Oct;471(4):553-557
65. De Miguel V, Paissan A, Riveros LFU, Scheinfeld EG, Marchinena PG , Jurado A , Day PF, Alfie J, Isola M & Ferraris J. Bilateral pheochromocytoma after kidney transplantation. *Endocrine Reviews*; Jun 2017; vol. 38 (no. 3)
66. Takamatsu N. Hypertensive emergency resulting as type 2 myocardial infarction in a patient with neurofibromatosis type 1. *Diagnosis*; Mar 2017; vol. 4 (no. 1)
67. Almeida MT, Chiavoni CR.; Almeida MQ, Hoff AO, Bronstein MD, Chambo JL, Soares S, Fragoso MCBV & Mendonca BB. Malignant pheochromocytoma in a neurofibromatosis type 1 patient: A case report. *Endocrine Reviews*; 2013; vol. 34 (no. 3)
68. Ng XY, Lee JJ, Yang PS & Cheng SP. Pheochromocytoma and renal artery aneurysm in neurofibromatosis type 1. *Am Surg.* 2012 Apr;78(4):E213-4.
69. Bümning P, Nilsson B, Sörensen J, Nilsson O & Ahlman H. Use of 2-tracer PET to diagnose gastrointestinal stromal tumour and pheochromocytoma in patients with Carney triad and neurofibromatosis type 1. *Scand J Gastroenterol.* 2006 May;41(5):626-30.
70. Magill SB, Fritsche CM, Klinger DE, Tector AJ& Shaker JL. Evolution of a pheochromocytoma. *Endocr Pract.* 2006 Sep-Oct;12(5):545-51.
71. Azhough R, Barband AR, Motayagheni N, Niafar M & Pourfathi H. Spontaneous rupture of adrenal pheochromocytoma in a patient with Von Recklinghausen's disease. *Indian J Crit Care Med.* 2009 Apr-Jun;13(2):94-5
72. Petidis K, Douma S, Doumas M, Papaefthimiou P, Kartali N , Vogiatzis K & Zamboulis C . Pheochromocytoma: "The Great Mimic" Thrombosis of Portal Vein and Splenic Vessels as First Presentation of Pheochromocytoma. *The Endocrinologist* 2008;18: 121–123

73. Wong CL, Fok CK & Tam VH. Concurrent primary hyperparathyroidism and pheochromocytoma in a Chinese lady with neurofibromatosis type 1. *Endocrinol Diabetes Metab Case Rep.* 2018 Mar 28;2018.
